# Supplementary material for: A critical evaluation of added sugars and non-nutritive sweeteners in processed food products
Source: Research Square preprint supplement (doi:10.21203/rs.3.rs-8455675/v1), 2026-01-08
Supplement: Supplementary file 1 [file 6c9639a2979b0c18f983ebcb.docx]

**Appendix****1 Percentage of local and import food products from each category**

| Food categories | Local | | Import | | Countries as labelled in food packaged (Top 4 importers for each category (from highest to lowest) |
| --- | --- | --- | --- | --- | --- |
|  | n | % | n | % |  |
| Dairy products | 18 | 51.4 | 17 | 48.6 | France, South Africa, New Zealand, Spain |
| Soft drinks/Energy drinks | 16 | 45.7 | 19 | 54.3 | South Africa, UK, Europe, Malaysia |
| Meat products | 13 | 37.1 | 22 | 62.9 | France, South Africa, Malaysia, Spain |
| Fruit juices | 11 | 31.4 | 24 | 68.6 | France, South Africa, Malaysia, UAE |
| Convenience foods and curry pastes | 11 | 31.4 | 24 | 68.6 | France, South Africa, Denmark, Indonesia |
| Pickles | 8 | 22.9 | 27 | 77.1 | France, Spain, India, Pakistan |
| Marmalade, Jam, fruit preserves | 8 | 22.9 | 27 | 77.1 | France, Mauritius, Pakistan, South Africa |
| Alcoholic drinks | 8 | 22.9 | 27 | 77.1 | France, South Africa, Belgium, Spain |
| Biscuits and cakes | 7 | 20 | 28 | 80 | Malaysia, France, India, South Africa |
| Fruit drinks and syrups | 6 | 17.1 | 29 | 82.9 | France, Malaysia, South Africa, Austria |
| Snacks | 5 | 14.3 | 30 | 85.7 | Malaysia, Europe, France, China, Indonesia |
| Sauces | 2 | 5.7 | 33 | 94.3 | China, Thailand, Malaysia, Belgium |
| Candies and jelly products | 2 | 5.7 | 33 | 94.3 | France, South Africa, Malaysia ,China |
| Breakfast cereals | 1 | 2.9 | 34 | 97.1 | France, South Africa, Europe, Philippine |
| Chocolates | 1 | 2.9 | 34 | 97.1 | France, South Africa, Austria, Africa |
| Total (All products) | 117 | 334.3 | 408 | 1165.7 | France, Malaysia, South Africa, China |

**Appendix****2 Claims and declaration on food product labels**

| Food categories | Number of products containing claims/Declaration | Presence of Added sugar/NNS/Both | Name of Added Sugars/NNS | Total sugar content/ g /100 g or g/100 ml | Claims/Declaration |
| --- | --- | --- | --- | --- | --- |
| Fruit drinks and syrups | Product 1 | Both | Dextrose  Sucralose  Stevia | 0.5 | Zero sugars  Nutriscore B |
|  | | | | |
| Product 2 | NNS only | Sucralose  Acesulfame- potassium |  | Contains naturally occurring sugars / zero sugars |
|  | | | | |
| Product 3 | Both | Sugar  Acesulfame potassium  Aspartame  Sucralose | 3.9 | Low in calorie |
|  | | | | |
| Soft drinks/Energy drinks | Product 1 | Both | Sugar  Steviol glycoside |  | Low in calories |
|  | Product 2 | Both | Glucose Syrup Sucralose | 4.5 | Contains glucose |
|  | Product 3 | NNS only | Aspartame |  | No sugar No calories |

**bBoth = Containing added sugar and NNS**

**Appendix** **3 NNS labeling in various food categories**

|  |  | Label of Non-nutritive sweeteners on the food package | | |
| --- | --- | --- | --- | --- |
| Food categories | Number of products had presence of NNS | E code only  (n,%) | Name only  (n,%) | E code and name  (n,%) |
| Fruit drinks and syrup | 4 |  | 1(25) | 3(75) |
| Dairy products | 2 |  |  | 2(100) |
| Soft Drinks/Energy drinks | 17 |  | 5(29.4) | 12(70.6) |
| Candies and jelly products | 2 |  |  | 2(100) |
| Snacks | 2 |  |  | 2(100) |
| Chocolates | 1 | 1(100) |  |  |
| Fruit juices | 5 | 3(60) |  | 2(40) |
| Total | 33 | 4(12.1) | 6(18.2) | 23(69.7) |

**Appendix 4 Number of added sugars used among the processed food products in each food category**

A single product from candies/jelly products category can contain 1 to 4 types of added sugars.

| Food categories | Number of added sugars used | |
| --- | --- | --- |
|  | Mean | Min-max |
| Marmalade, Jam , fruit preserves | 1 | 1 |
| Breakfast cereals | 2 | 1-3 |
| Sauces | 1 | 1-2 |
| Fruit drinks and syrups | 1 | 1-2 |
| Dairy products | 1 | 1-2 |
| Soft drinks/Energy drinks | 1 | 1-2 |
| Biscuits and cakes | 2 | 1-3 |
| Meat products | 1 | 1-2 |
| Candies and jelly products | **3** | **1-4** |
| Alcoholic drinks | 1 | 1-2 |
| Snacks | 1 | 1-2 |
| Pickles | 1 | 1-2 |
| Chocolates | **2** | **1-4** |
| Fruit juices | 1 | 1-2 |
| Convenience foods and curry pastes | 1 | 1-2 |
| Total (All products) | 1 | 1-4 |

**aThe mean number was rounded to one significant number.**

**Appendix 5 Number of NNS used among the processed food products in each food category**

A single product from the soft drinks/Energy drinks category can contain 1 to 4 types of NNS.

| **Food categories** | **Number of NNS used** | |
| --- | --- | --- |
|  | *Mean | Min-max |
| Marmalade, Jam , fruit preserves | - | - |
| Breakfast cereals | - | - |
| Sauces | - | - |
| Fruit drinks and syrups | 2 | 2-3 |
| Dairy products | 2 | 1-2 |
| **Soft drinks/Energy drinks** | **2** | **1-4** |
| Biscuits and cakes | - | - |
| Meat products | - | - |
| Candies and jelly products | - | 1-2 |
| Alcoholic drinks | - | - |
| Snacks | 1 | 1 |
| Pickles | - | - |
| Chocolates |  | 1 |
| Fruit juices | 2 | 1-2 |
| Convenience foods and curry pastes | - | - |
| Total (All products) | 1 | 1-4 |

**aThe mean number was rounded to one significant number.**
